# Supplementary material for: Morpho-sedimentary characteristics of Holocene paleochannels in the Upper Rhine alluvial plain, France
Source: Copernicus journal article supplement (doi:10.5194/egqsj-71-191-2022), 2022-09-08
Supplement: Supplementary file 1 [file egqsj-71-191-2022-supplement.zip]

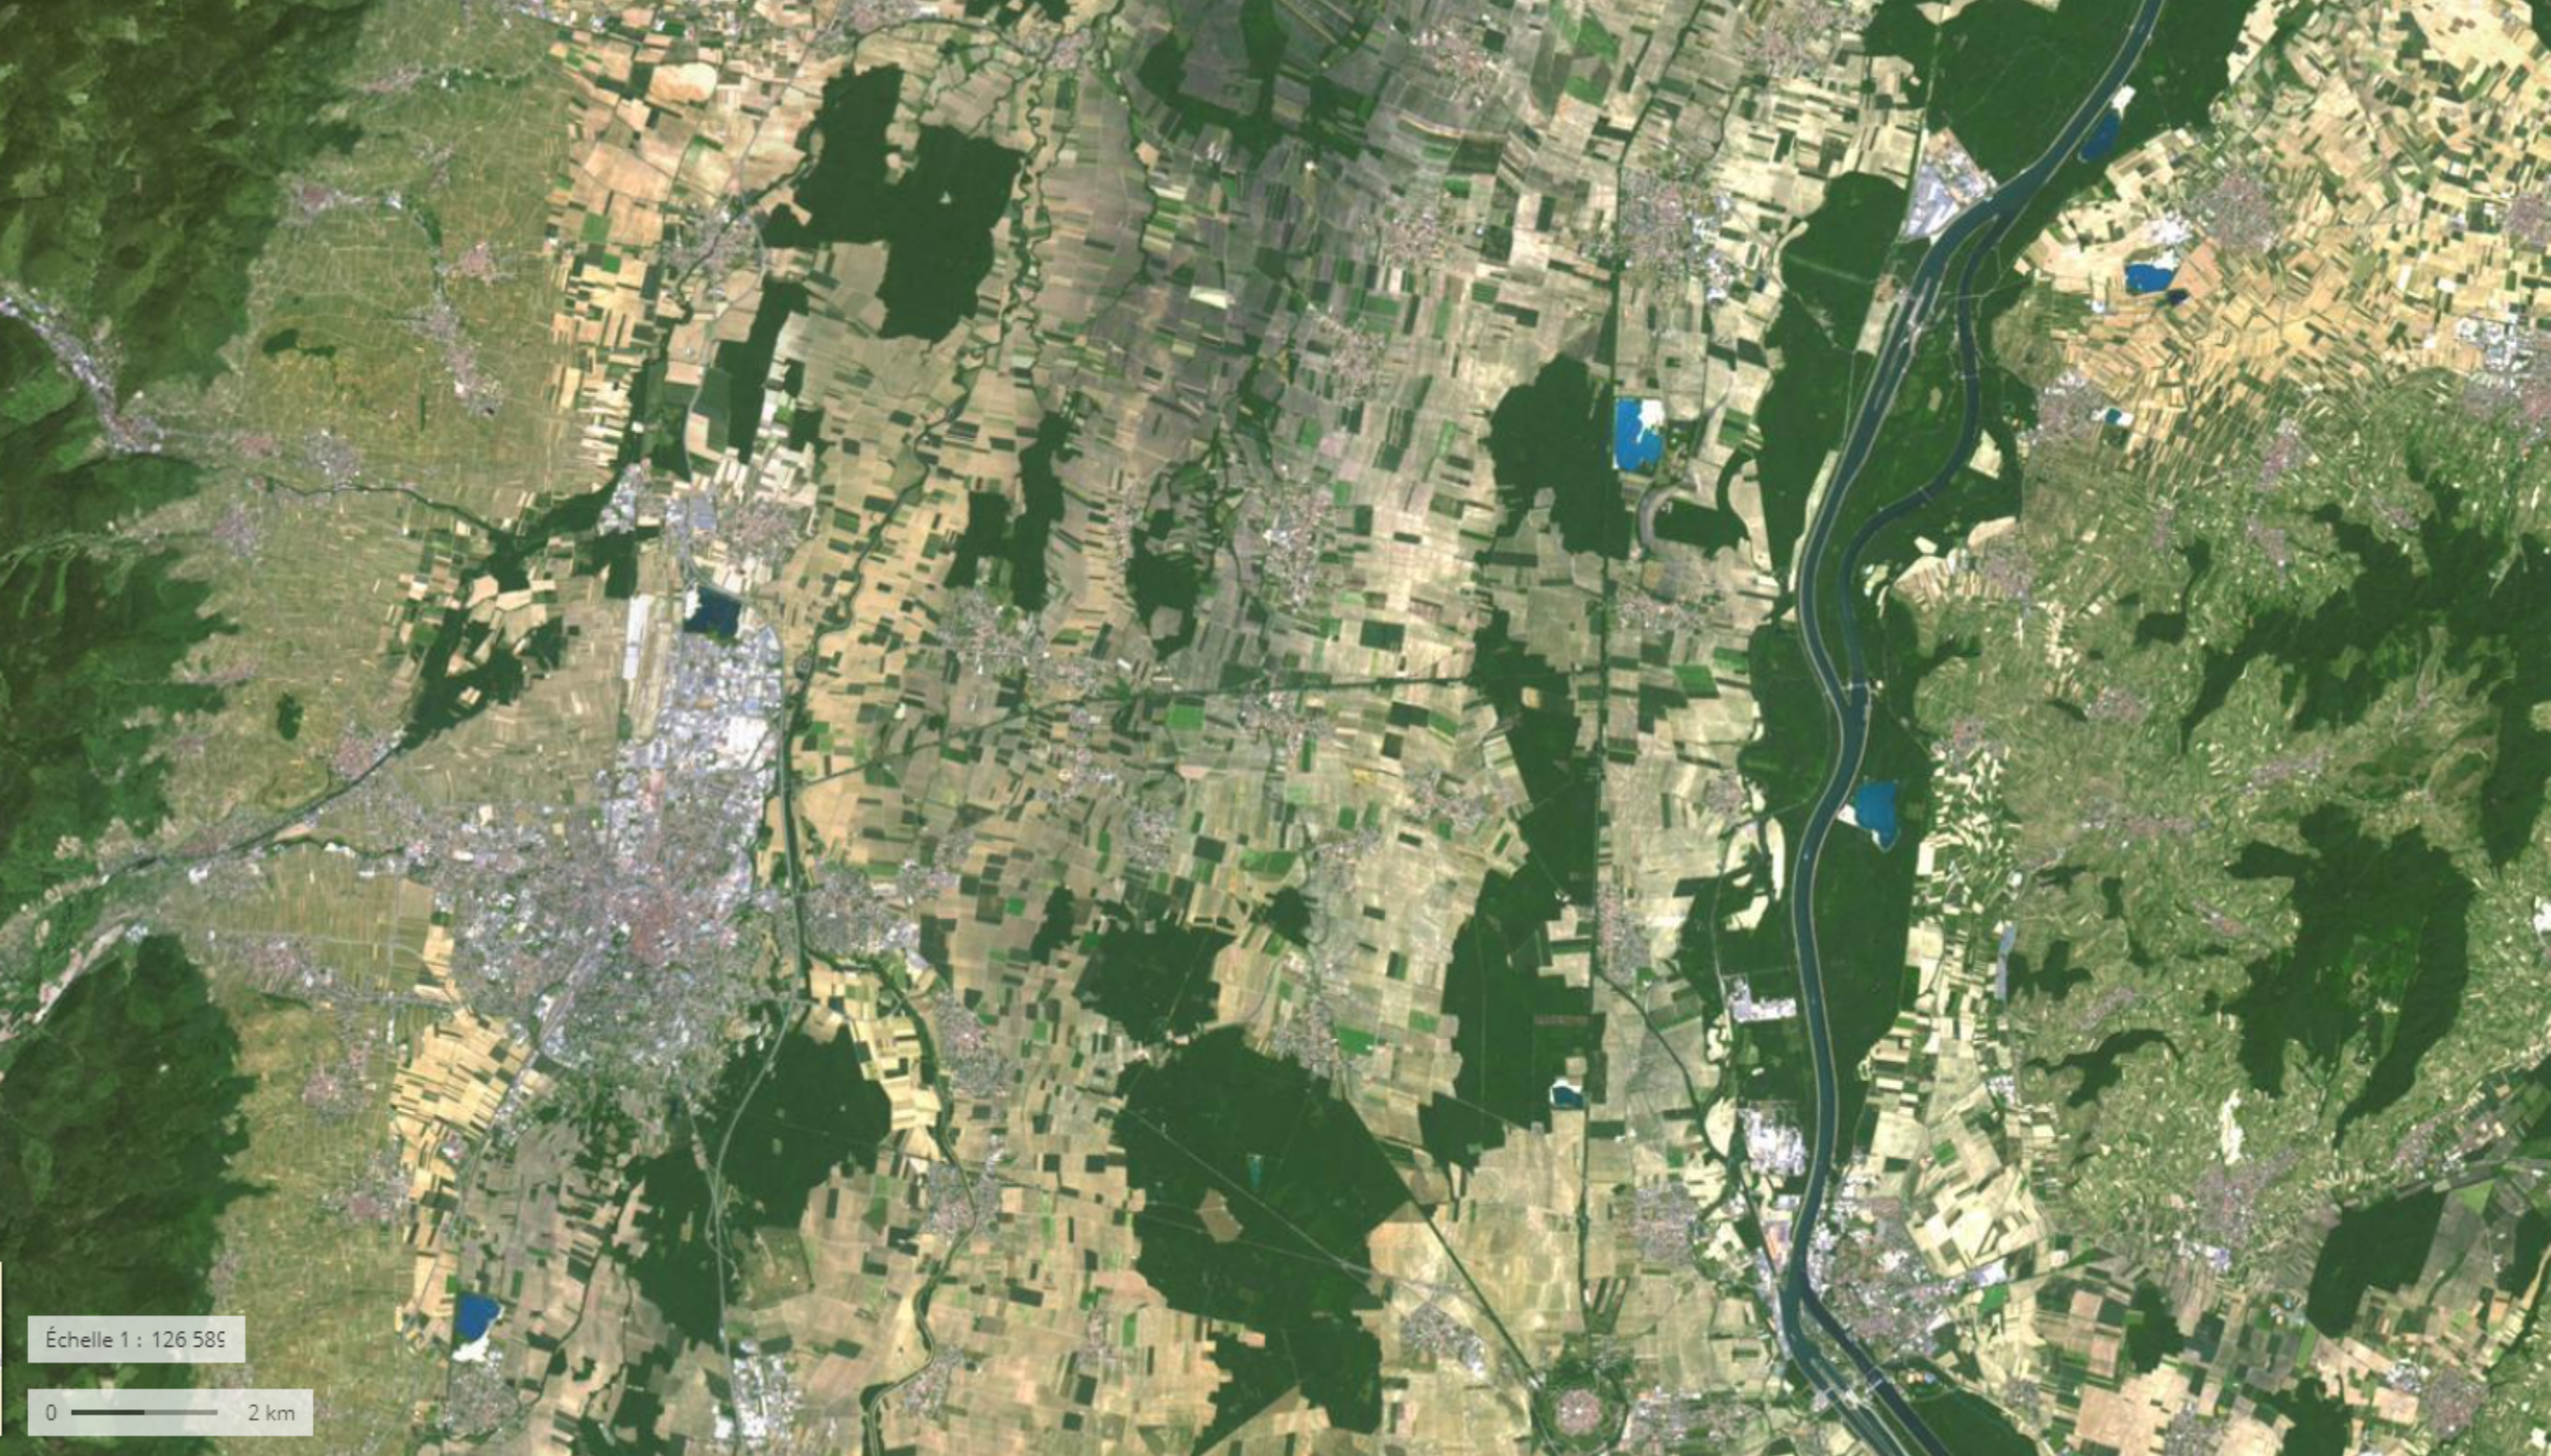

Échelle 1 : 126 585

0 — 2 km

Figure S5. Aerial photo of the extended study area. IGN, 2022. Source: <https://www.geoportail.gouv.fr/carte>
