# Supplementary material for: Morpho-sedimentary characteristics of Holocene paleochannels in the Upper Rhine alluvial plain, France
Source: Copernicus journal article supplement (doi:10.5194/egqsj-71-191-2022), 2022-09-08
Supplement: Supplementary file 2 [file egqsj-71-191-2022-supplement.zip]

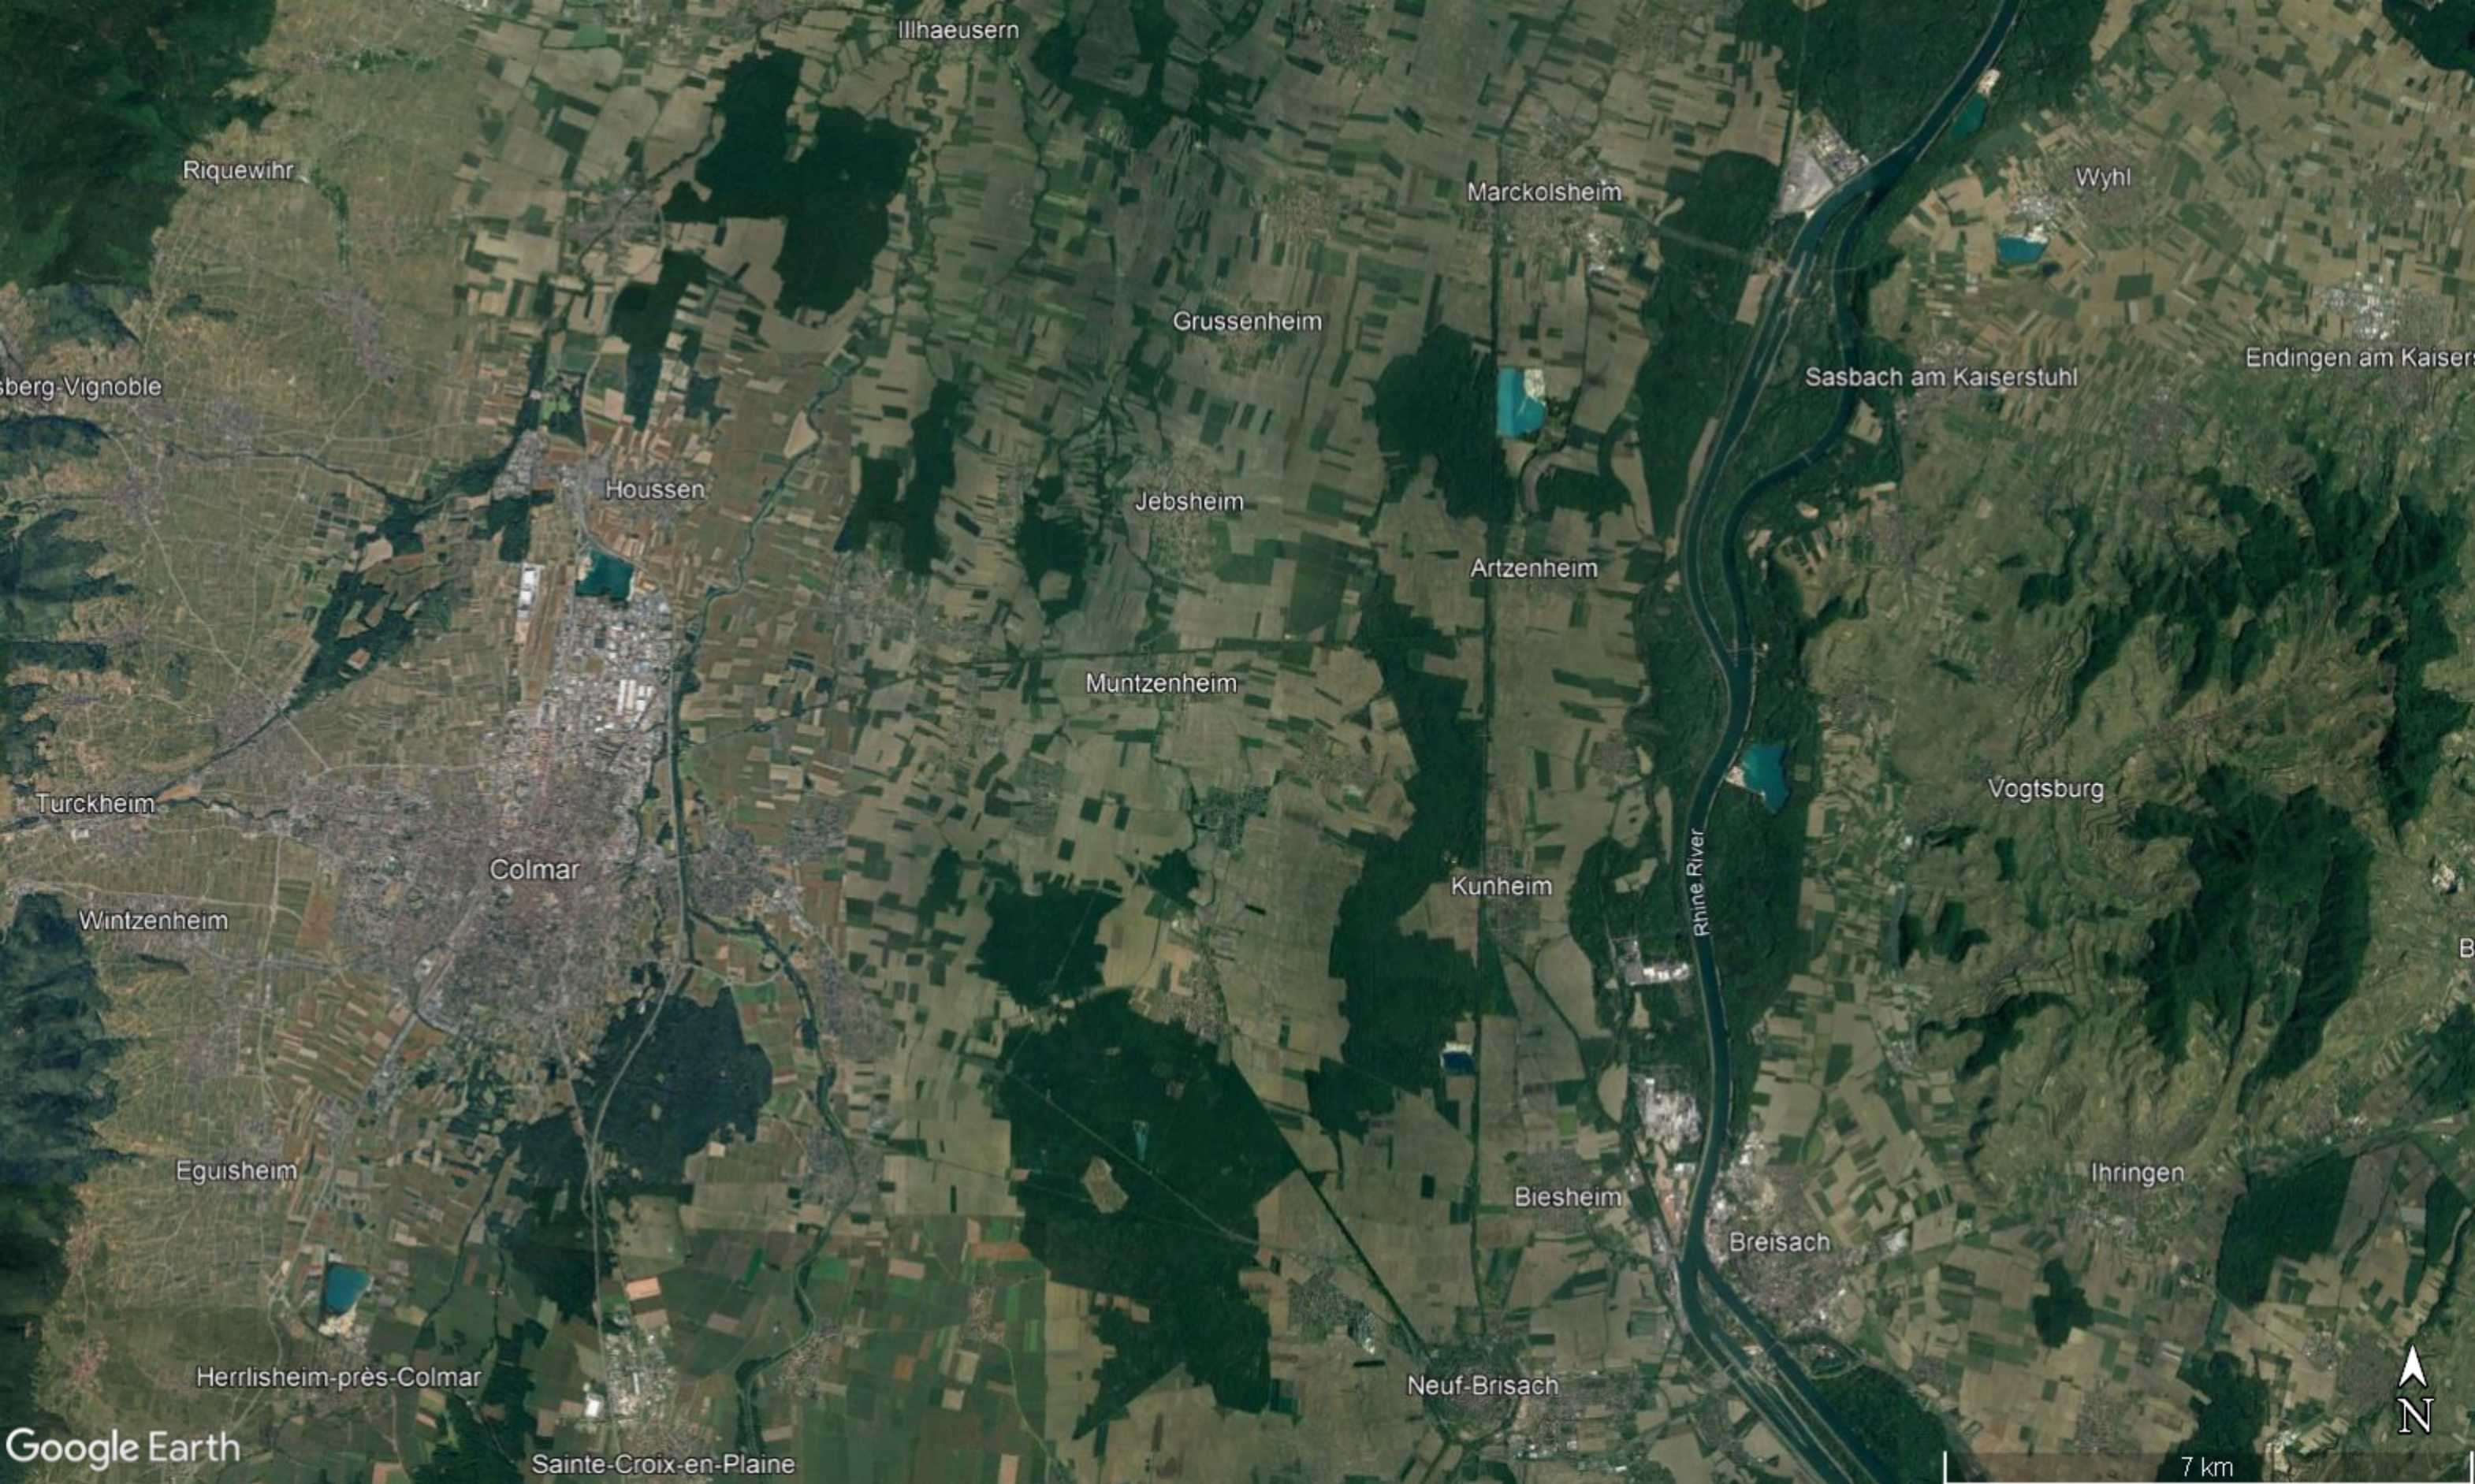

Figure S4. Aerial photo of the extended study area. Google Earth, 2020. Source: <https://www.google.com/earth/index.html>
