# Supplementary material for: Morpho-sedimentary characteristics of Holocene paleochannels in the Upper Rhine alluvial plain, France
Source: Copernicus journal article supplement (doi:10.5194/egqsj-71-191-2022), 2022-09-08
Supplement: Supplementary file 3 [file egqsj-71-191-2022-supplement.zip]

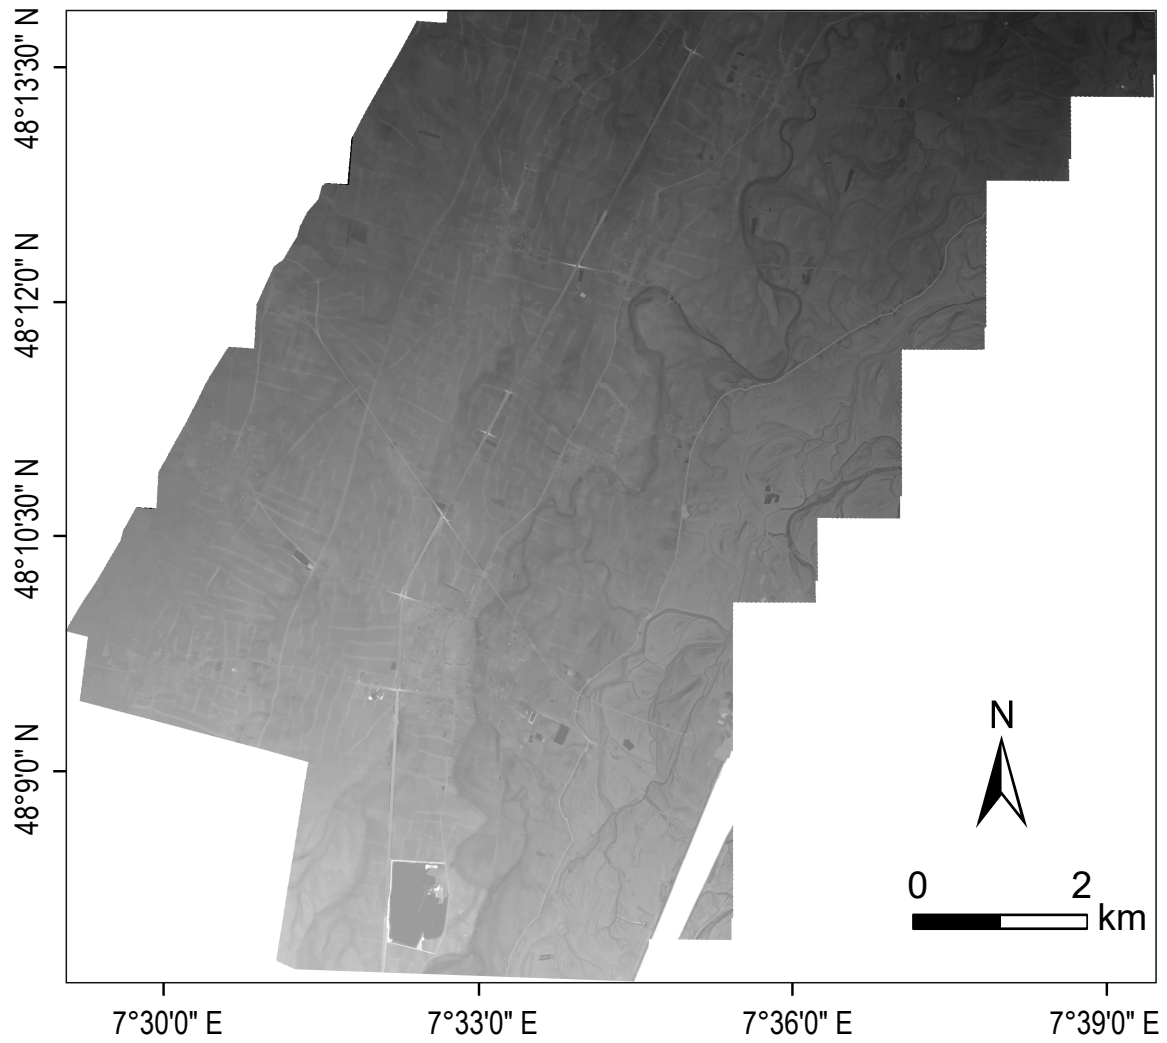

Figure S2. Photogrammetric DTM of the area currently lacking LiDAR data. Photogrammetric DTM was obtained from the RGE ALTI database of the National Institute of Geographic and Forestry Information, France (IGN-F).
