# Supplementary material for: Morpho-sedimentary characteristics of Holocene paleochannels in the Upper Rhine alluvial plain, France
Source: Copernicus journal article supplement (doi:10.5194/egqsj-71-191-2022), 2022-09-08
Supplement: Supplementary file 4 [file egqsj-71-191-2022-supplement.zip]

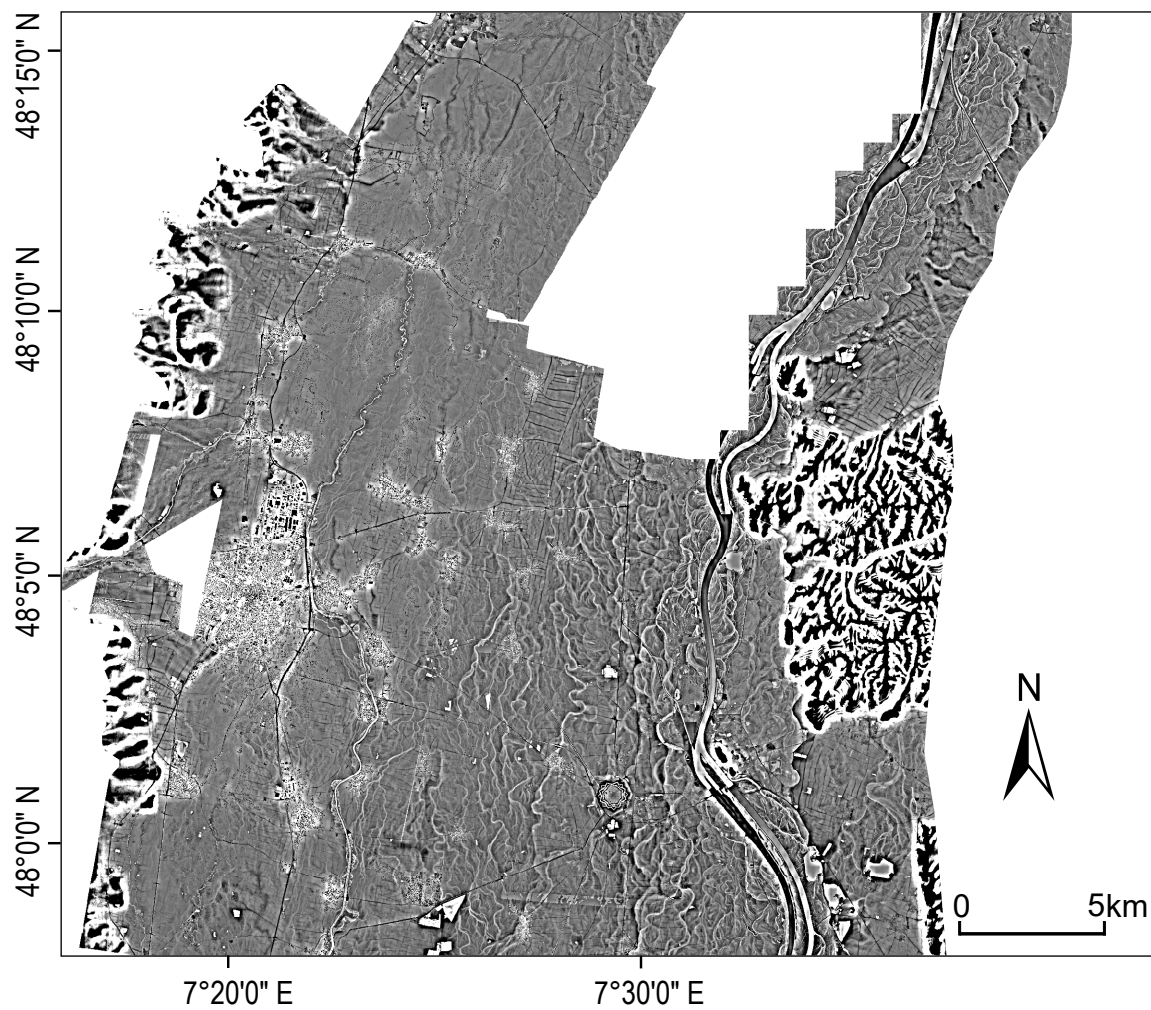

Figure S1. LiDAR-derived digital elevation model (DEM) of the Central Alsace Plain. Data provided by the Regional Council of Grand Est and the European Collectivity of Alsace.
