# Supplementary material for: Morpho-sedimentary characteristics of Holocene paleochannels in the Upper Rhine alluvial plain, France
Source: Copernicus journal article supplement (doi:10.5194/egqsj-71-191-2022), 2022-09-08
Supplement: Supplementary file 5 [file egqsj-71-191-2022-supplement.zip]

(a)

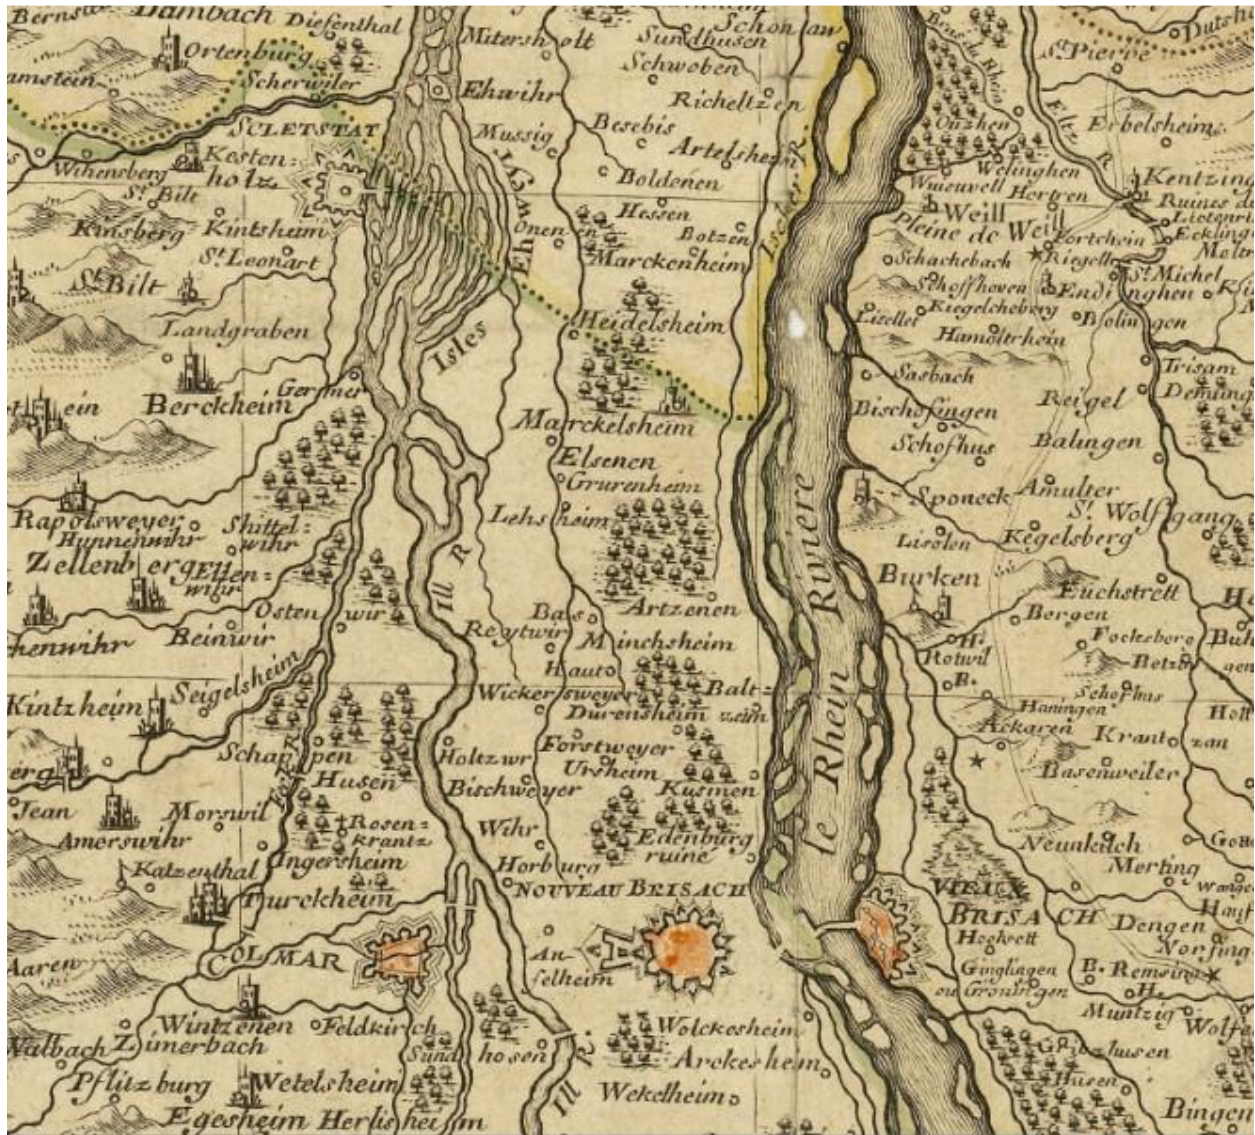

| Year | Author (s)                      | Source                                              |
|------|---------------------------------|-----------------------------------------------------|
| 1702 | Nicolas de Fer; Daniel Specklin | National University Library of<br>Strasbourg (BNUS) |



(b)

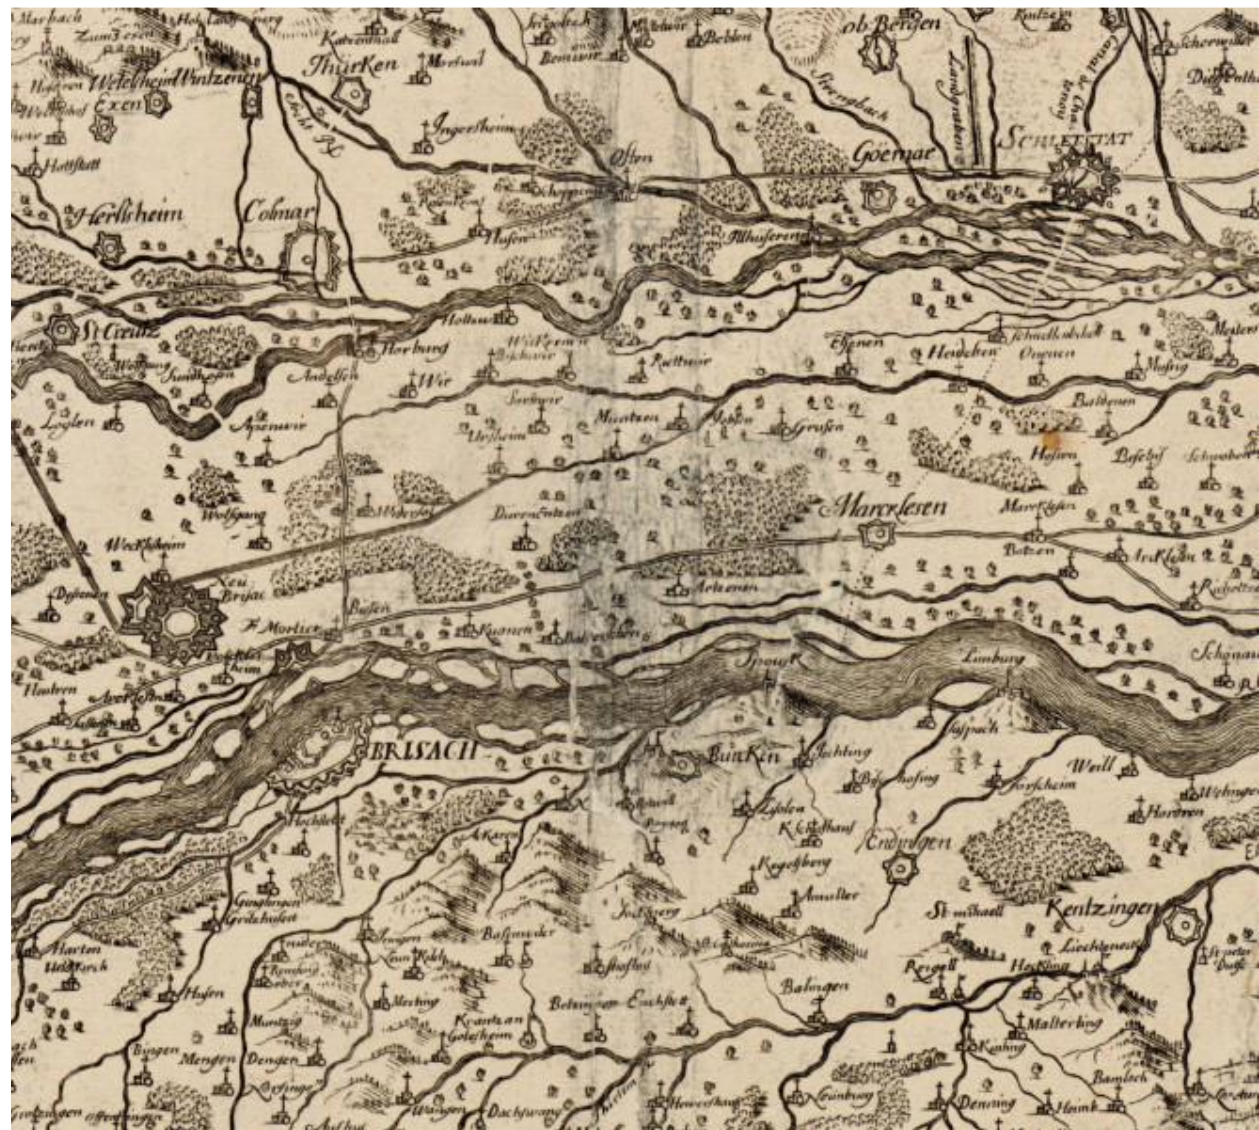

| Year | Author (s)                                    | Source                                           |
|------|-----------------------------------------------|--------------------------------------------------|
| 1703 | Georg Friedrich Meyer; Johannes Lucas Hofmann | National University Library of Strasbourg (BNUS) |



(c)

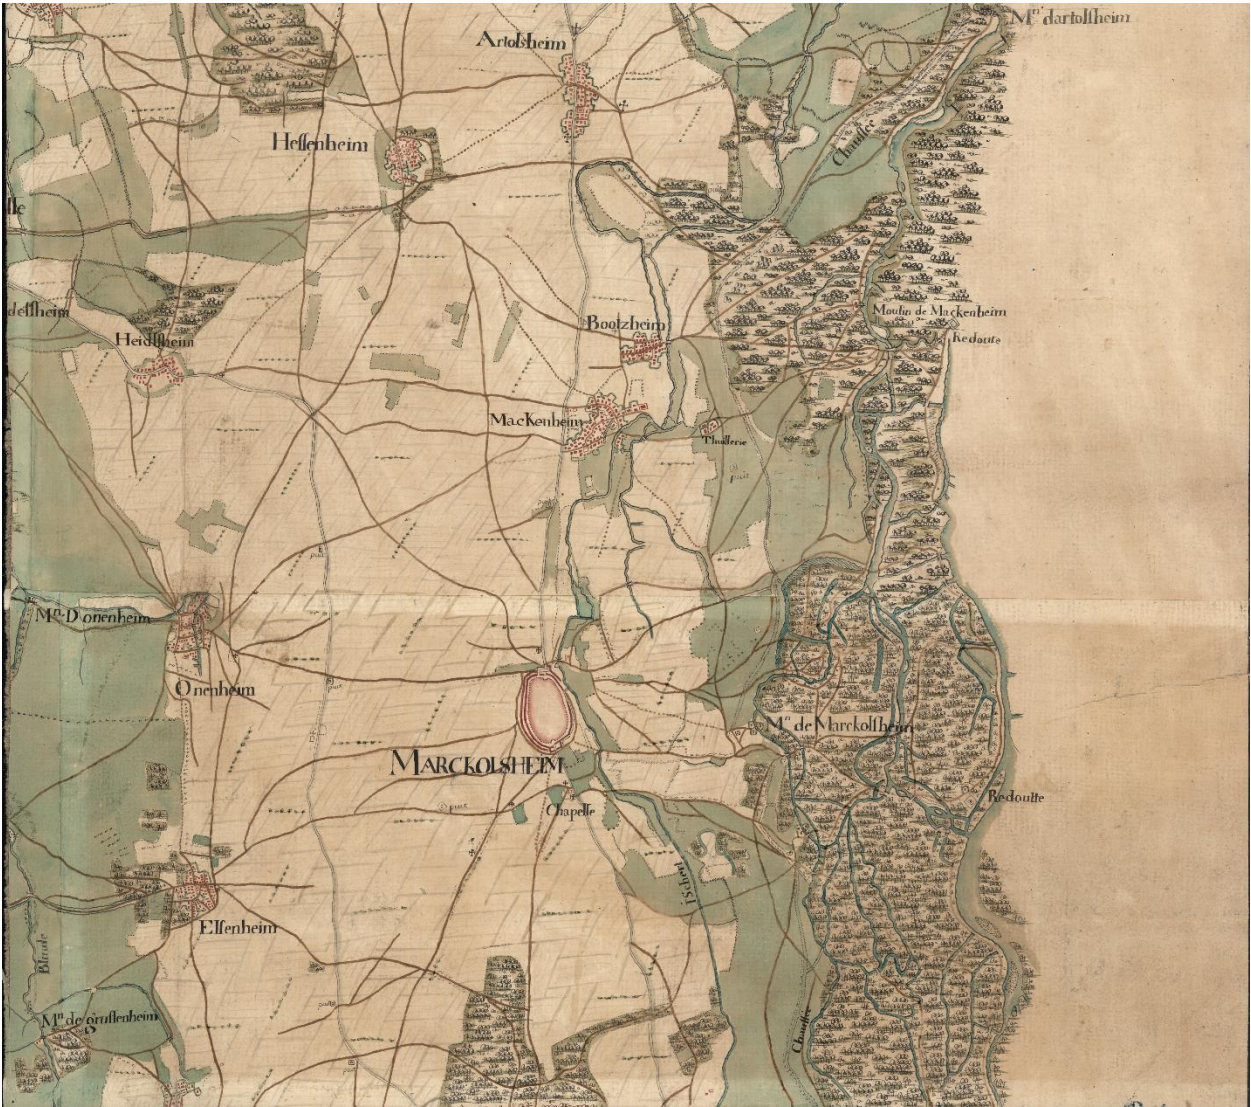

| Year | Author (s)  | Source               |
|------|-------------|----------------------|
| 1710 | Sr. Broutin | War Archives, Vienna |



(d)

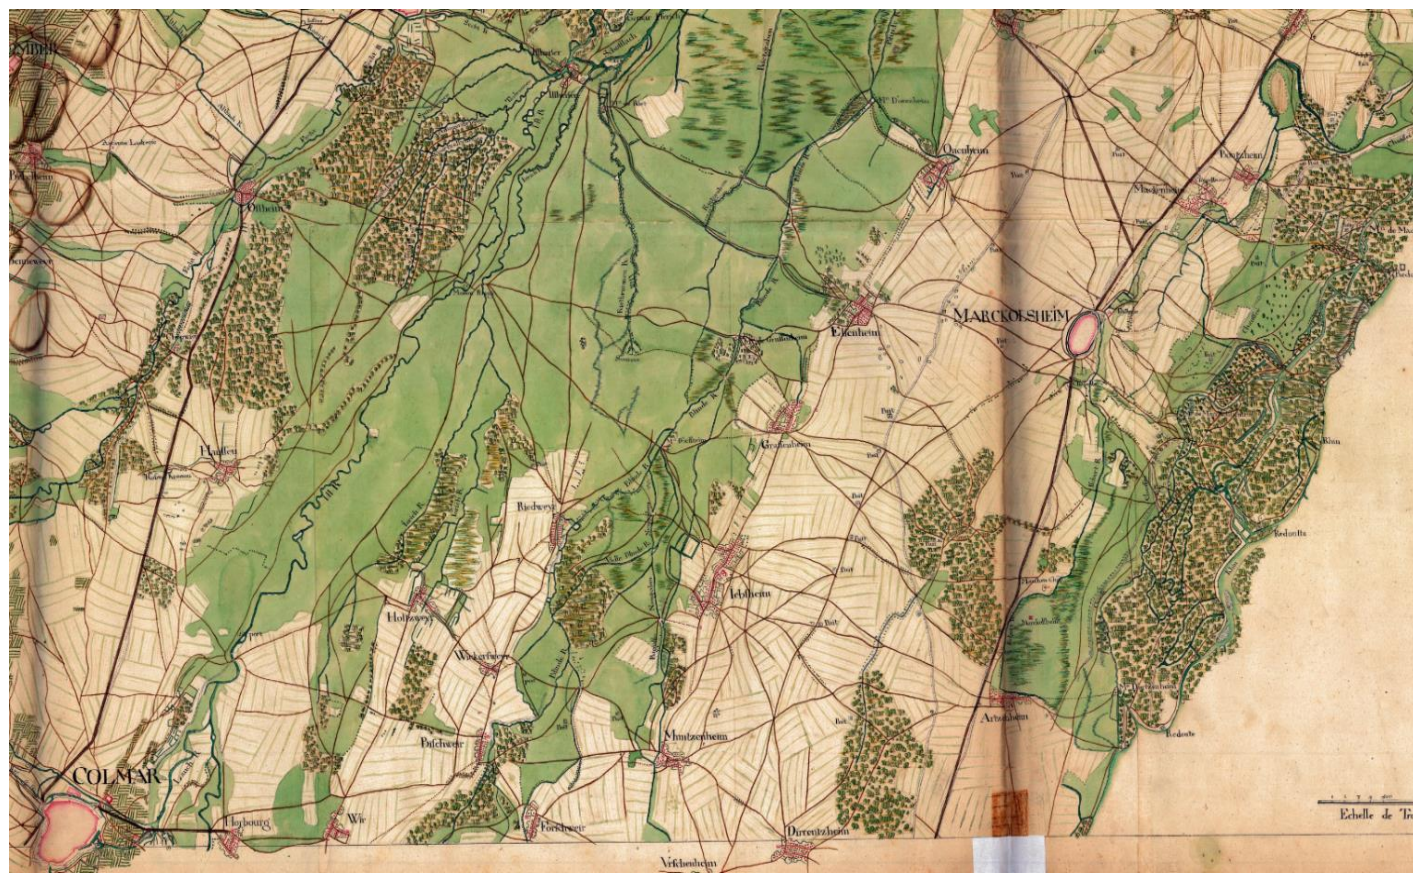

| Year | Author (s)   | Source                             |
|------|--------------|------------------------------------|
| 1722 | Undetermined | Saint-Mandé map library of the IGN |



(e)

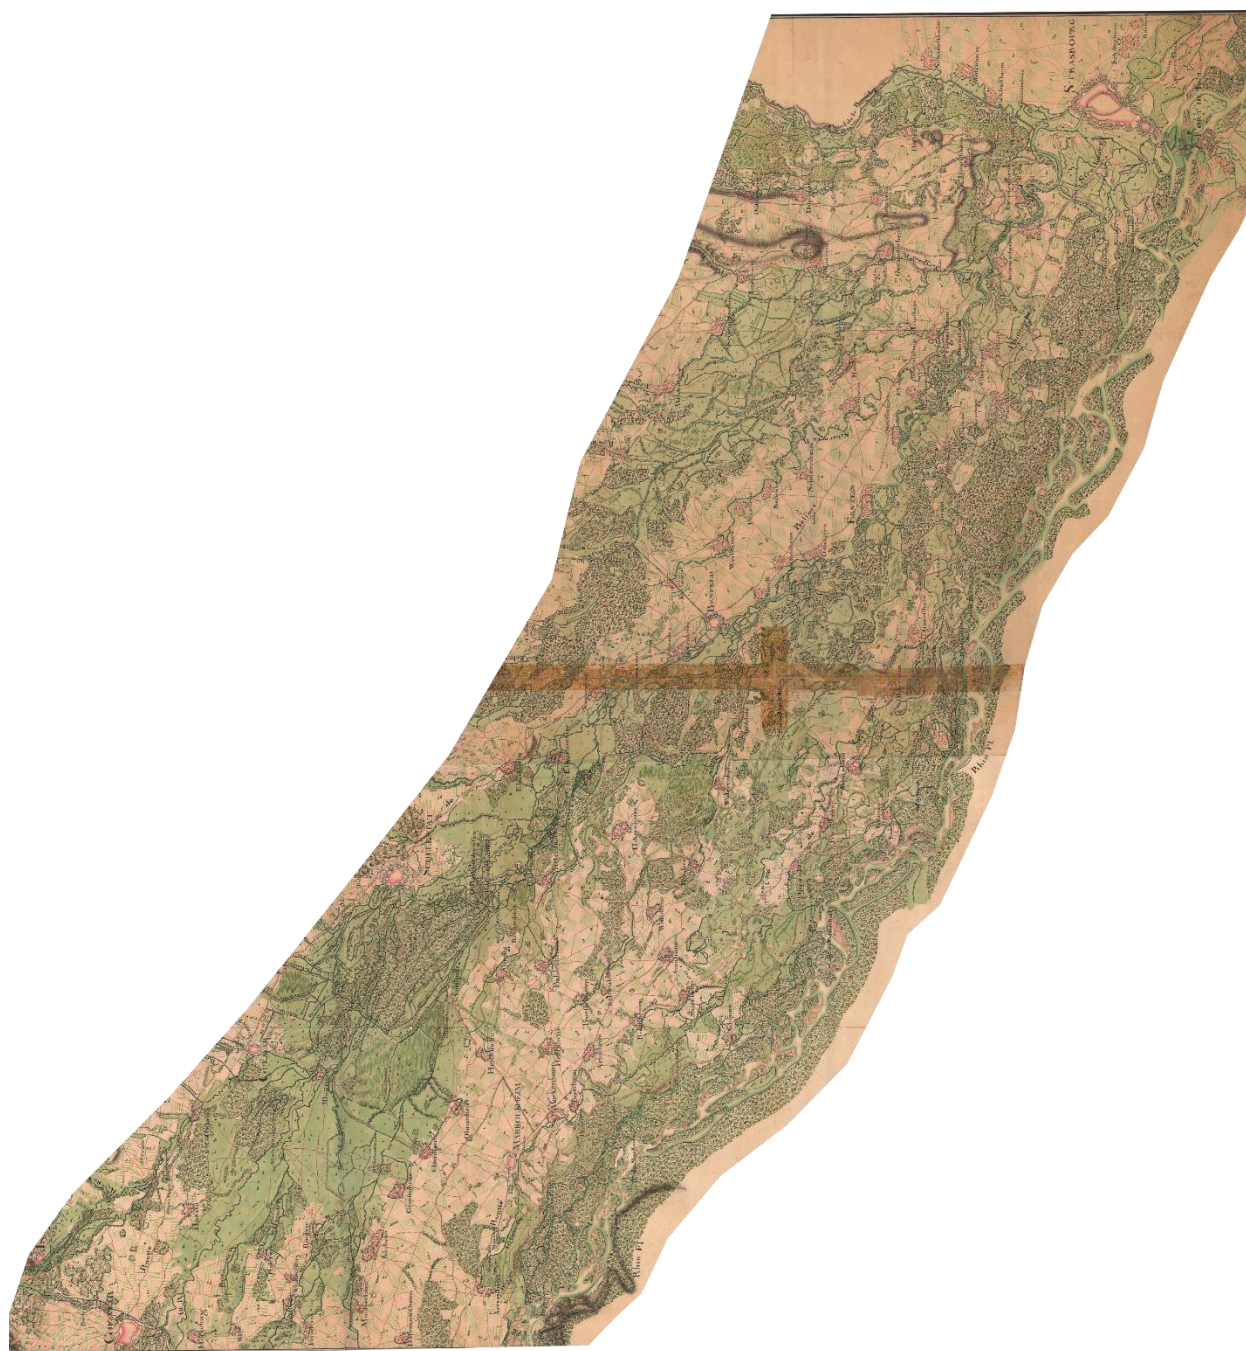

| Year | Author (s)          | Source                             |
|------|---------------------|------------------------------------|
| 1732 | Louis de Regemortes | Saint-Mandé map library of the IGN |

(f)

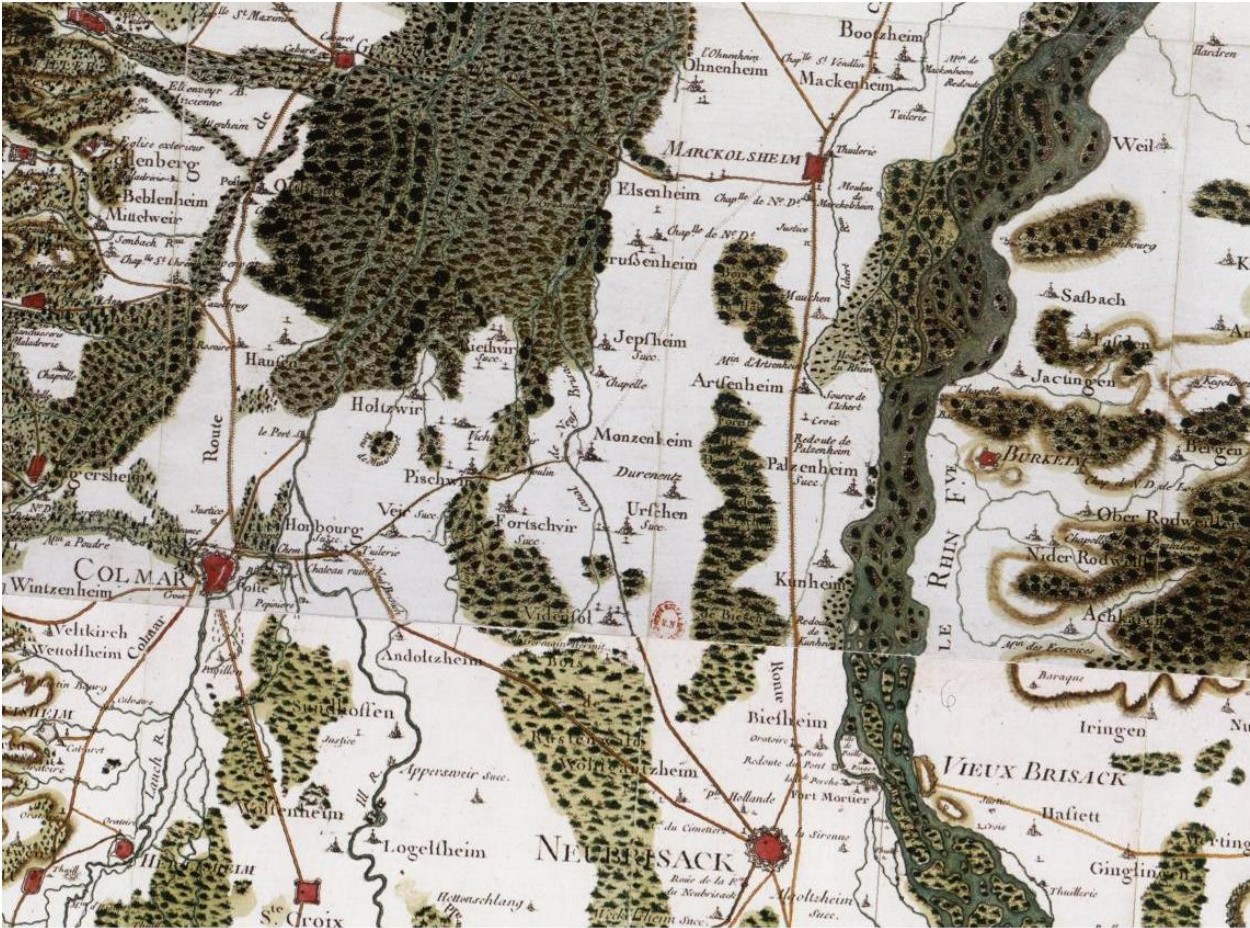

| Year | Author (s)                      | Source     |
|------|---------------------------------|------------|
| 1760 | César-François Cassini de Thury | GéoPortail |



(g)

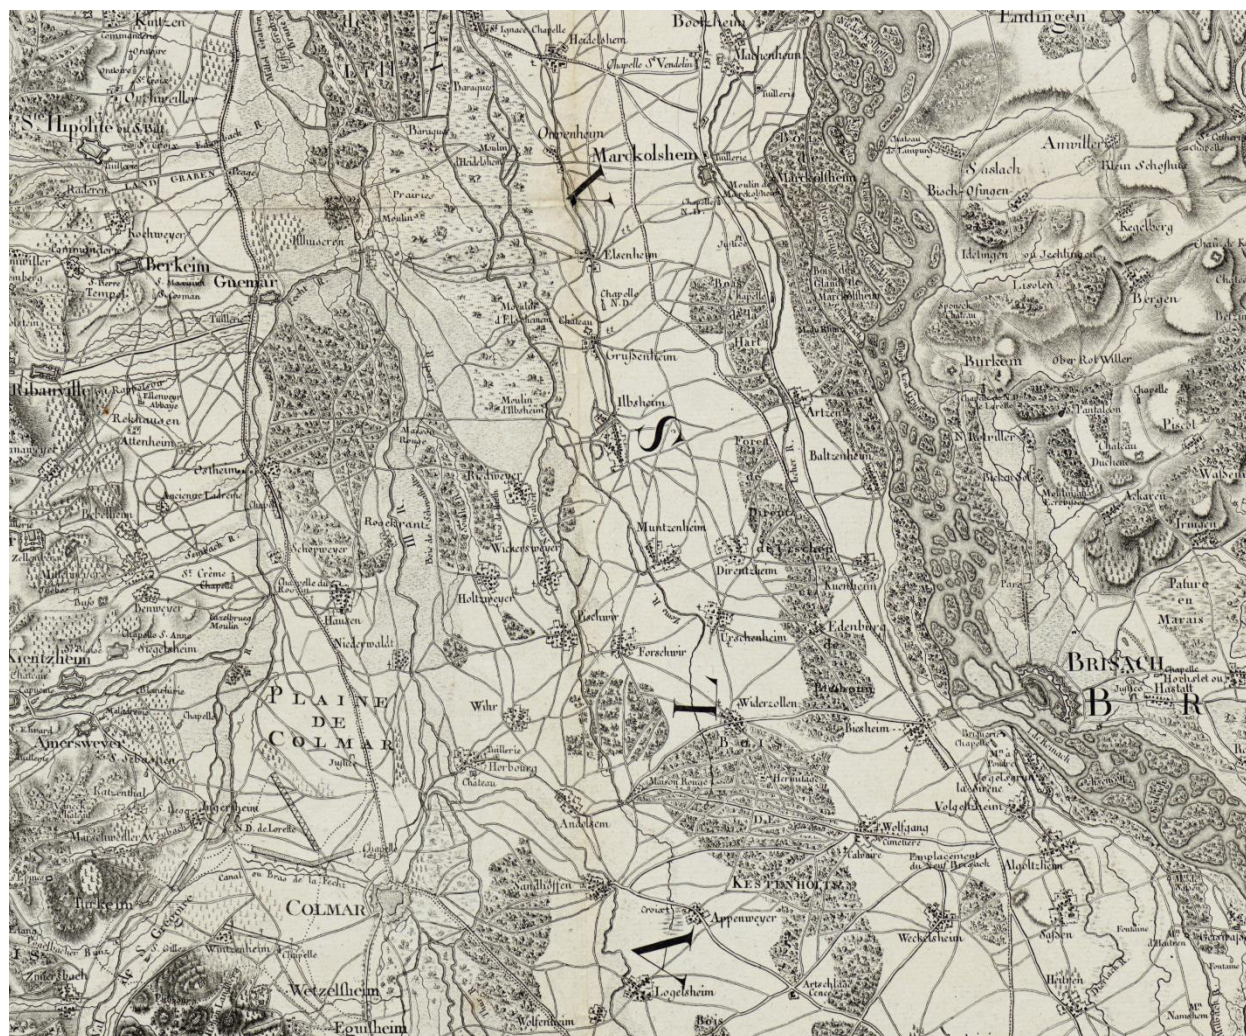

| Year | Author (s)             | Source                                              |
|------|------------------------|-----------------------------------------------------|
| 1782 | Chevalier de, Beaurain | National University Library of<br>Strasbourg (BNUS) |



(h)

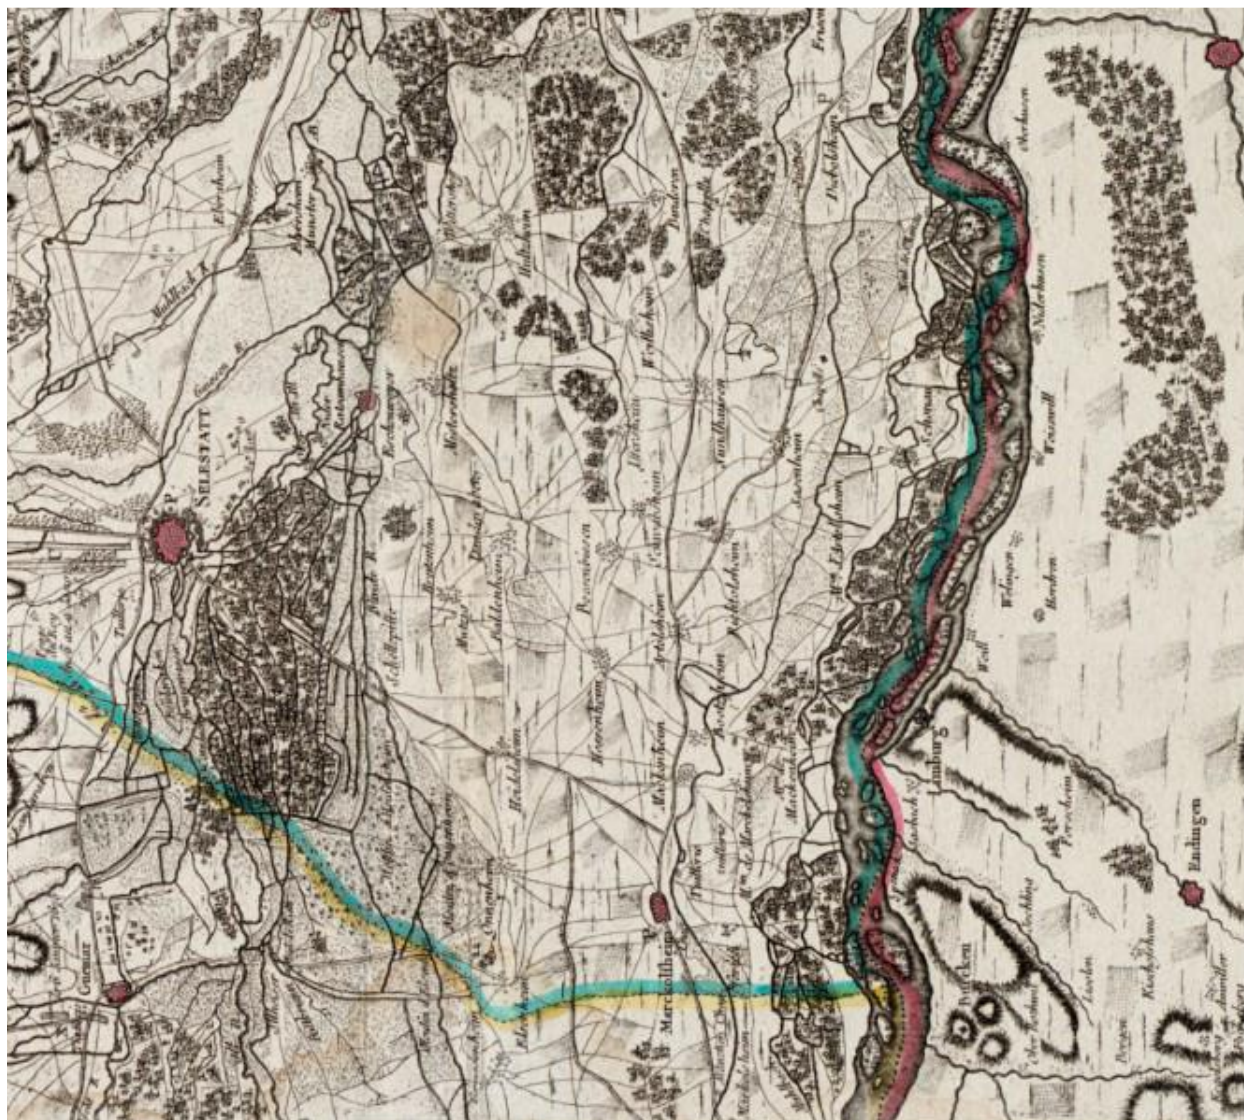

| Year | Author (s)                           | Source                                           |
|------|--------------------------------------|--------------------------------------------------|
| 1802 | Georges-Louis Le Rouge, Charles Dien | National University Library of Strasbourg (BNUS) |



(i)

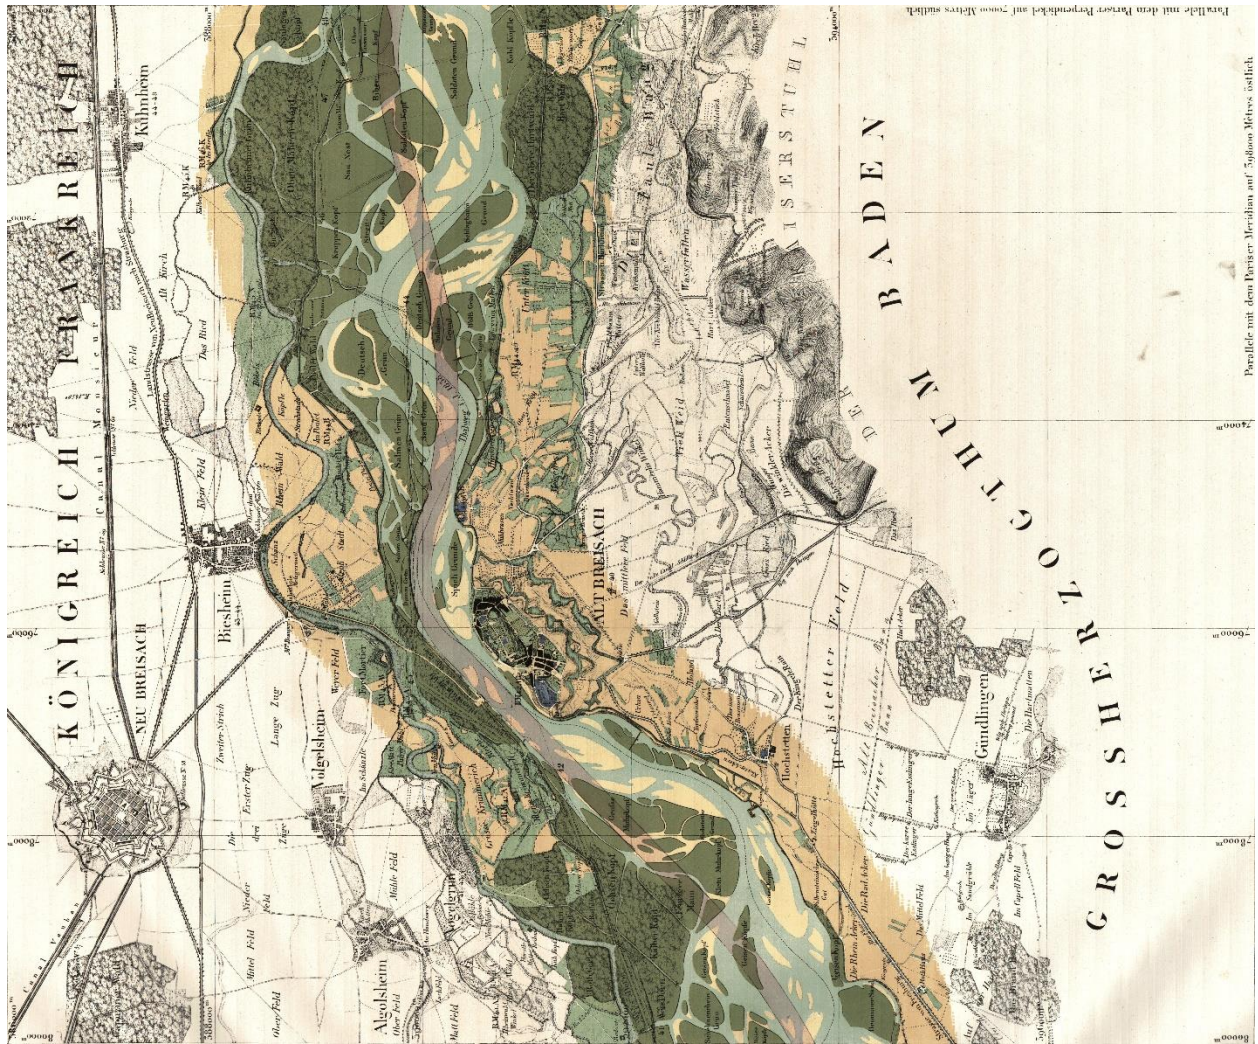

| Year | Author (s)                                     | Source                                           |
|------|------------------------------------------------|--------------------------------------------------|
| 1838 | Johan Gottfried Tulla, Mueller C F, Hutter F H | National University Library of Strasbourg (BNUS) |
