# Supplementary material for: Morpho-sedimentary characteristics of Holocene paleochannels in the Upper Rhine alluvial plain, France
Source: Copernicus journal article supplement (doi:10.5194/egqsj-71-191-2022), 2022-09-08
Supplement: Supplementary file 6 [file egqsj-71-191-2022-supplement.zip]

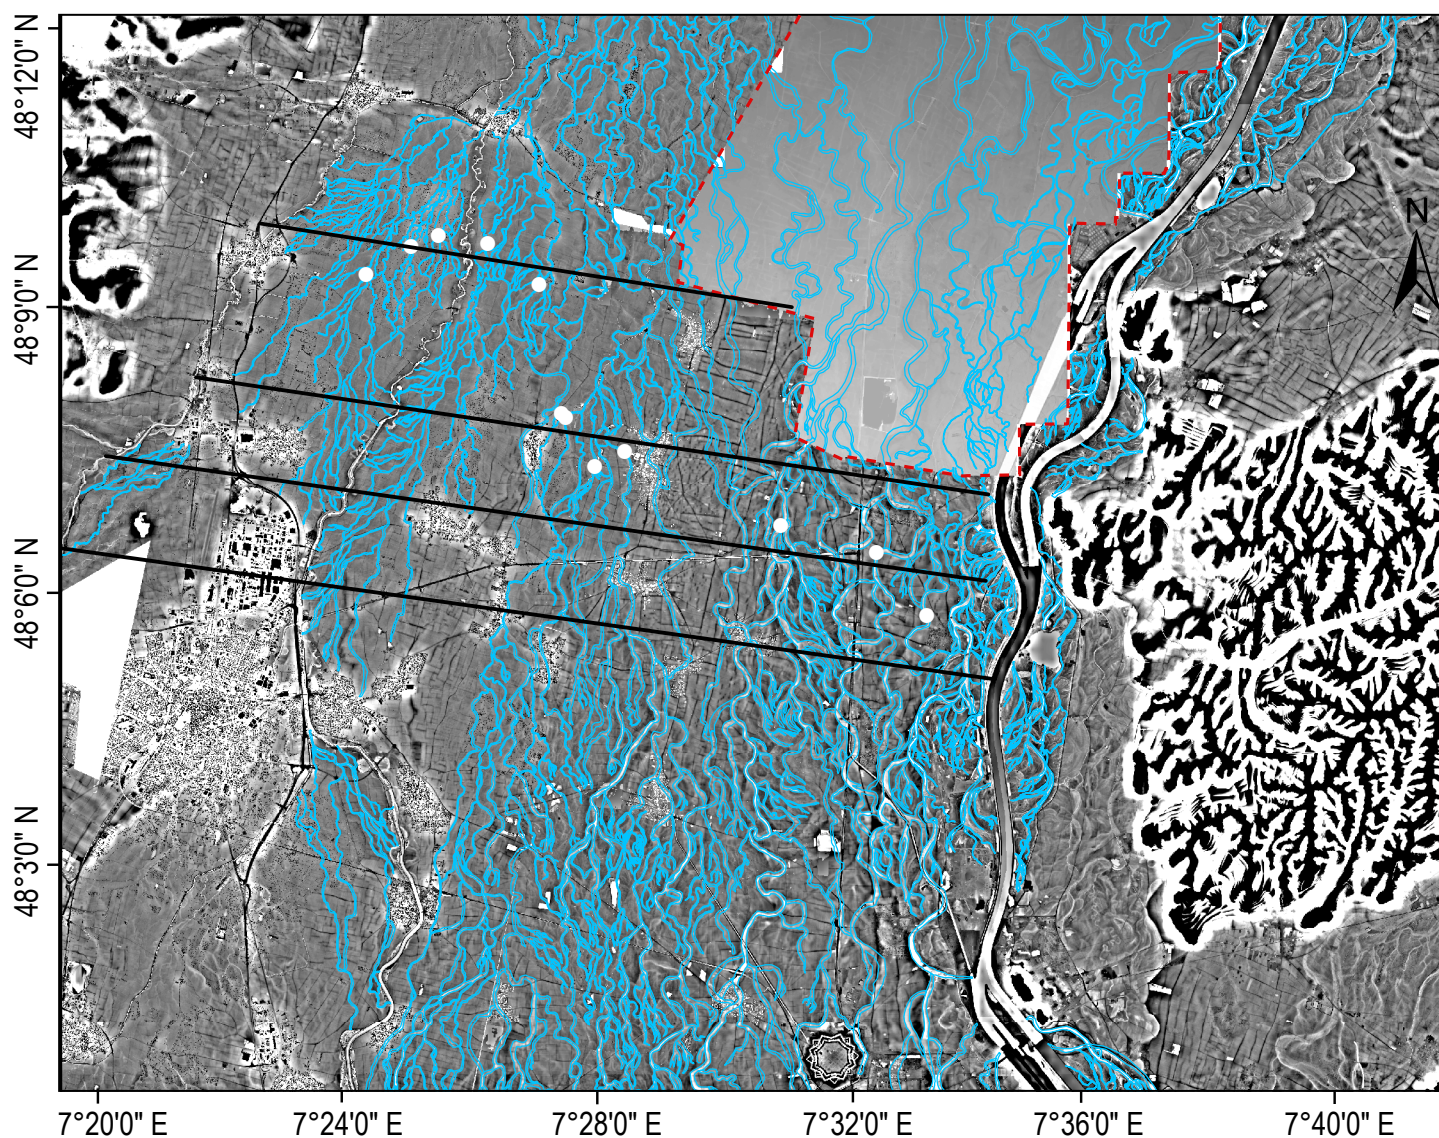

— Mapped paleochannels

- - - Limit of photogrammetric DTM

— Transect lines

○ Investigated paleochannels

0 2.5 5 km

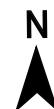

Data source  
LiDAR- Regional Council of Grand Est, and European  
Collectivity of Alsace  
Photogrammetric DTM-National Institute of Geographic  
and Forestry Information, France (IGN)

Figure S3. LiDAR DTM with transect lines drawn perpendicular to the main valley orientation, used to measure the surface topographic properties of the paleochannels.
