# Supplementary material for: Morpho-sedimentary characteristics of Holocene paleochannels in the Upper Rhine alluvial plain, France
Source: Copernicus journal article supplement (doi:10.5194/egqsj-71-191-2022), 2022-09-08
Supplement: Supplementary file 7 [file egqsj-71-191-2022-supplement.zip]

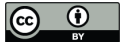

## *Supplement of*

# **Morpho-sedimentary characteristics of Holocene paleochannels in the Upper Rhine alluvial plain, France**

**Mubarak Abdulkarim et al.**

*Correspondence to:* Mubarak Abdulkarim ([mubarak.abdulkarim@geologie.uni-freiburg.de](mailto:mubarak.abdulkarim@geologie.uni-freiburg.de))

- [egqsj-71-191-2022-supplement-title-page.pdf](#)
- [Abdulkarim et al. 2022\\_Supplement](#)
  - [Fig. S2. Photogrammetric DTM.pdf](#)
  - [Fig. S4. Aerial photo of extended study area \(Google Earth\).pdf](#)
  - [Fig. S5. Aerial photo of extended study area \(Geoportail\).pdf](#)
  - [Fig. S6. Historical Maps.pdf](#)
  - [Fig.S1. LiDAR DEM.pdf](#)
  - [Fig.S3. LiDAR with transect lines.pdf](#)
  - [Mid Infrared Spectroscopy.xlsx](#)
  - [Morphometric analysis.xlsx](#)

The copyright of individual parts of the supplement might differ from the article licence.
